# Supplementary material for: Similarities and differences between stakeholders’ opinions on using Health Technology Assessment (HTA) information across five European countries: results from the EQUIPT survey
Source: PubMed Central journal article supplement (PMC4882811; doi:10.1186/s12961-016-0110-7), 2016-05-26
Supplement: 12961_2016_110_MOESM1_ESM.pdf [file 12961_2016_110_MOESM1_ESM.pdf]

The first page is to be filled in before the interview.

1. Country: .....
2. ID number: .....
3. Date of the interview (dd-mm-yy): .....
4. Role of the interviewee:
  - a. Decision maker
  - b. Purchaser of services/pharma products
  - c. Professional, service provider
  - d. Evidence generator
  - e. Advocate of health promotion
  - f. Other, indicate:
5. Name of the interviewer (in capitals): .....
6. Duration of the interview: .....

I hereby declare, that I handle the information collected securely, and provide it only for authorised person participating in the EQUIPT project. The data is anonymised before use.

.....  
Signature of the interviewer

## Part A. Introduction

Hello, my name is ..... from ..... We are participating in an international research project that investigates how the Tobacco Return On Investment Tool, developed by the National Institute for Health and Care Excellence (NICE) in the UK, can be adapted and transferred to different European countries, including [your country]. Hereafter, this tool is referred to as the “Tobacco ROI tool” for convenience.

The specific aims of the project are:

- to develop Tobacco ROI tools in four EU countries (Germany, Hungary, the Netherlands and Spain);
- to assess the needs for and ideas of using the Tobacco Return On Investment Tool to compare the results of ROI analysis across these countries;
- to transfer policy recommendations to other European countries not included in the sample.

In Part I. of the interview I will ask some general questions about setting priorities (what kind of information do you use when you make decisions on investments in tackling the scourge of tobacco?) related to tobacco control measures and smoking cessation interventions. In Part II. I will show you a presentation of the Tobacco ROI tool, and then I will ask you some questions about this tool.

We will tell you more about the Tobacco ROI tool in a minute.

To facilitate the best use of the ROI tool, we would ask for further input from you to fine tune the presentation of the tool and its results to ensure its relevance for practice.

Thank you for agreeing to provide a perspective. We appreciate your advice on how we can best shape this work so that it can provide greatest practical value to you. Our conversation should last approximately 40 minutes. I really appreciate your time and inputs to this process.

May we start the interview now? If you do not mind, I would tape-record it to save time. Is that okay?

Start the tape recorder and record the ID number

7. Can you briefly introduce yourself, your role and your responsibilities?

---

---

---

---

The Tobacco ROI tool basically calculates locally the return on investment for different packages of tobacco control measures. Please answer the upcoming question based on the information provided earlier. Here is your own copy of the questionnaire. Please answer the upcoming question based on the information provided earlier. We will provide you with more information about the tool in a minute

8. Could you please indicate on a scale from 1 to 7, 1 meaning “strongly disagree” and 7 meaning “strongly agree” to what extent you agree with the following statement: “I have the intention to use an economic tool such as the Tobacco ROI for decision making/information gathering concerning tobacco control.” Please circle your answer as appropriate in the questionnaire.

|                   |   |   |   |   |   |                |   |  |
|-------------------|---|---|---|---|---|----------------|---|--|
| Strongly Disagree |   |   |   |   |   | Strongly Agree |   |  |
| 1                 | 2 | 3 | 4 | 5 | 6 | 7              | ? |  |

9. Could you please indicate on a scale from 1 to 7 - 1 meaning “strongly disagree” and 7 meaning “strongly agree” to what extent you agree with the following statements? Please circle your answer in the column to the right.

|                                                                                                                                          | Strongly Disagree |   |   | Strongly Agree |   |   |   |   |
|------------------------------------------------------------------------------------------------------------------------------------------|-------------------|---|---|----------------|---|---|---|---|
| A. “Incremental costs” means how much the studied intervention itself costs more or less than the comparator intervention                | 1                 | 2 | 3 | 4              | 5 | 6 | 7 | ? |
| B. When interventions in itself are cheap, they are always cost-effective compared to another intervention                               | 1                 | 2 | 3 | 4              | 5 | 6 | 7 | ? |
| C. “Willingness to pay” means how much a society is willing to pay for a quality adjusted life year or QALY                              | 1                 | 2 | 3 | 4              | 5 | 6 | 7 | ? |
| D. My intervention can be cost-effective compared to another intervention, even when its societal costs are higher than the regular care | 1                 | 2 | 3 | 4              | 5 | 6 | 7 | ? |
| E. In a health care payer perspective, indirect costs in full (such as productivity losses) are included                                 | 1                 | 2 | 3 | 4              | 5 | 6 | 7 | ? |

10. Could you please indicate on a scale from 1 to 7 - 1 meaning “strongly disagree” and 7 meaning “strongly agree” to what extent you agree with the following statements? Please circle your answer in the column to the right.

|                                                                                                            | Strongly Disagree |   |   | Strongly Agree |   |   |   |   |
|------------------------------------------------------------------------------------------------------------|-------------------|---|---|----------------|---|---|---|---|
| A. The smoking epidemic is not severe in my country                                                        | 1                 | 2 | 3 | 4              | 5 | 6 | 7 | ? |
| B. Most smoking cessation interventions are effective                                                      | 1                 | 2 | 3 | 4              | 5 | 6 | 7 | ? |
| C. Most smoking cessation interventions are cost-effective                                                 | 1                 | 2 | 3 | 4              | 5 | 6 | 7 | ? |
| D. It is important to use smoking cessation interventions because smoking kills a lot of people            | 1                 | 2 | 3 | 4              | 5 | 6 | 7 | ? |
| E. It is important to use smoking cessation interventions because smoking costs a lot for the society      | 1                 | 2 | 3 | 4              | 5 | 6 | 7 | ? |
| F. It is unacceptable that we use smoking cessation interventions without knowing their efficacy           | 1                 | 2 | 3 | 4              | 5 | 6 | 7 | ? |
| G. It is unacceptable that we use smoking cessation interventions without knowing their cost-effectiveness | 1                 | 2 | 3 | 4              | 5 | 6 | 7 | ? |

**Part B. Needs assessment**

Now, let me show you a short video about the return on investment tool.

[Show the video](#)

11. Could you please indicate on a scale from 1 to 7 - 1 meaning “strongly disagree” and 7 meaning “strongly agree” to what extent you agree with the following statements? Please circle your answer in the column to the right.

| If I were to use a tool such as the Tobacco ROI tool, it needs to give me:                                                                                                                                                          | Strongly Disagree |   |   | Strongly Agree |   |   |   |   |
|-------------------------------------------------------------------------------------------------------------------------------------------------------------------------------------------------------------------------------------|-------------------|---|---|----------------|---|---|---|---|
| A. Data on <b>prevalence</b> of smoking as reported in surveys and scientific studies                                                                                                                                               | 1                 | 2 | 3 | 4              | 5 | 6 | 7 | ? |
| B. Data on <b>costs of smoking</b>                                                                                                                                                                                                  | 1                 | 2 | 3 | 4              | 5 | 6 | 7 | ? |
| C. Data on <b>quality of life</b> as reported in surveys and scientific studies                                                                                                                                                     | 1                 | 2 | 3 | 4              | 5 | 6 | 7 | ? |
| D. Data on <b>mortality</b> due to smoking                                                                                                                                                                                          | 1                 | 2 | 3 | 4              | 5 | 6 | 7 | ? |
| E. <b>Effectiveness</b> of smoking cessation interventions (such as quit and relapse rate) as reported in scientific studies                                                                                                        | 1                 | 2 | 3 | 4              | 5 | 6 | 7 | ? |
| F. <b>Cost-effectiveness</b> data comparing the cost of smoking cessation interventions with its health and wider benefits                                                                                                          | 1                 | 2 | 3 | 4              | 5 | 6 | 7 | ? |
| G. <b>Budget impact</b> reflecting financial outcomes specifically at organisational level                                                                                                                                          | 1                 | 2 | 3 | 4              | 5 | 6 | 7 | ? |
| H. Are there any other types of evidence that you consider important about the decision/information gathering on the implementation of tobacco control measures and smoking cessation interventions?<br><br><hr/><br><hr/><br><hr/> |                   |   |   |                |   |   |   |   |

12. Do you know about any other economic/financial models/tools of tobacco control measures/smoking cessation interventions (such as a decision tree or the WHO tobacco tax simulation model)?

- a. No → Go to question 13
- b. Yes

Could you please give one or more examples?

---



---

**Part C. Tobacco ROI Tool**

Now we would like to ask you some questions about the Tobacco ROI Tool just presented to you.  
We are interested in your expectations or beliefs about the upcoming tool

13. Could you please indicate on a scale from 1 to 7 - 1 meaning “strongly disagree” and 7 meaning “strongly agree” to what extent you agree with the following statements? Please circle your answer in the column to the right.

|                                                                                                                                        | Strongly<br>Disagree                                                                                                                                                                                                                                                                                        |   |   |   |   |   | Strongly<br>Agree |   |
|----------------------------------------------------------------------------------------------------------------------------------------|-------------------------------------------------------------------------------------------------------------------------------------------------------------------------------------------------------------------------------------------------------------------------------------------------------------|---|---|---|---|---|-------------------|---|
| A. The Tobacco ROI tool has more advantages than disadvantages for me                                                                  | 1                                                                                                                                                                                                                                                                                                           | 2 | 3 | 4 | 5 | 6 | 7                 | ? |
| <b><i>What could be <u>advantages</u> for you of the Tobacco ROI tool?<br/>I believe that a tool such as the Tobacco ROI tool:</i></b> |                                                                                                                                                                                                                                                                                                             |   |   |   |   |   |                   |   |
| B. provides me with financial justification for my decision making/<br>information gathering                                           | 1                                                                                                                                                                                                                                                                                                           | 2 | 3 | 4 | 5 | 6 | 7                 | ? |
| C. is easy to use                                                                                                                      | 1                                                                                                                                                                                                                                                                                                           | 2 | 3 | 4 | 5 | 6 | 7                 | ? |
| D. provides me with up-to-date information                                                                                             | 1                                                                                                                                                                                                                                                                                                           | 2 | 3 | 4 | 5 | 6 | 7                 | ? |
| E. provides relevant outcomes for my organisation                                                                                      | 1                                                                                                                                                                                                                                                                                                           | 2 | 3 | 4 | 5 | 6 | 7                 | ? |
| F. provides sufficient scientific support for decision making                                                                          | 1                                                                                                                                                                                                                                                                                                           | 2 | 3 | 4 | 5 | 6 | 7                 | ? |
| G. provides added value to the information currently used                                                                              | 1                                                                                                                                                                                                                                                                                                           | 2 | 3 | 4 | 5 | 6 | 7                 | ? |
| H. helps me decide which smoking cessation methods I should choose                                                                     | 1                                                                                                                                                                                                                                                                                                           | 2 | 3 | 4 | 5 | 6 | 7                 | ? |
| I. integrates all relevant information available to calculate cost-<br>effectiveness                                                   | 1                                                                                                                                                                                                                                                                                                           | 2 | 3 | 4 | 5 | 6 | 7                 | ? |
| J. can calculate the cost-effectiveness outcomes over different periods<br>such as 2 years, 5 years, 10 years, and lifetime            | 1                                                                                                                                                                                                                                                                                                           | 2 | 3 | 4 | 5 | 6 | 7                 | ? |
| K. can assess cost-effectiveness of potential new interventions                                                                        | 1                                                                                                                                                                                                                                                                                                           | 2 | 3 | 4 | 5 | 6 | 7                 | ? |
| L. helps increase efficiency in service delivery                                                                                       | 1                                                                                                                                                                                                                                                                                                           | 2 | 3 | 4 | 5 | 6 | 7                 | ? |
| M. What other advantages would a tool such as the Tobacco ROI tool have for you?                                                       | <hr style="border: 0; border-top: 1px solid green; margin-bottom: 10px;"/> <hr style="border: 0; border-top: 1px solid green; margin-bottom: 10px;"/> <hr style="border: 0; border-top: 1px solid green; margin-bottom: 10px;"/> <hr style="border: 0; border-top: 1px solid green; margin-bottom: 10px;"/> |   |   |   |   |   |                   |   |

| <b><i>What could be <u>disadvantages</u> for you of the Tobacco ROI tool?<br/>I believe that a tool such as the Tobacco ROI tool:</i></b> | <b>Strongly Disagree</b> |   |   |   |   |   |   | <b>Strongly Agree</b> |   |   |   |   |   |   |   |
|-------------------------------------------------------------------------------------------------------------------------------------------|--------------------------|---|---|---|---|---|---|-----------------------|---|---|---|---|---|---|---|
| N. is too time consuming to use                                                                                                           | 1                        | 2 | 3 | 4 | 5 | 6 | 7 | 1                     | 2 | 3 | 4 | 5 | 6 | 7 | ? |
| O. is not useful for my organisation                                                                                                      | 1                        | 2 | 3 | 4 | 5 | 6 | 7 | 1                     | 2 | 3 | 4 | 5 | 6 | 7 | ? |
| P. requires too much data input                                                                                                           | 1                        | 2 | 3 | 4 | 5 | 6 | 7 | 1                     | 2 | 3 | 4 | 5 | 6 | 7 | ? |
| Q. is too complex to work with                                                                                                            | 1                        | 2 | 3 | 4 | 5 | 6 | 7 | 1                     | 2 | 3 | 4 | 5 | 6 | 7 | ? |
| R. is not compatible with the way we work in our organisation                                                                             | 1                        | 2 | 3 | 4 | 5 | 6 | 7 | 1                     | 2 | 3 | 4 | 5 | 6 | 7 | ? |
| S. provides unreliable outcomes                                                                                                           | 1                        | 2 | 3 | 4 | 5 | 6 | 7 | 1                     | 2 | 3 | 4 | 5 | 6 | 7 | ? |
| T. does not provide insight on how the results are calculated                                                                             | 1                        | 2 | 3 | 4 | 5 | 6 | 7 | 1                     | 2 | 3 | 4 | 5 | 6 | 7 | ? |
| U. results into outcomes that are too broad                                                                                               | 1                        | 2 | 3 | 4 | 5 | 6 | 7 | 1                     | 2 | 3 | 4 | 5 | 6 | 7 | ? |
| V. is not needed for my daily work                                                                                                        | 1                        | 2 | 3 | 4 | 5 | 6 | 7 | 1                     | 2 | 3 | 4 | 5 | 6 | 7 | ? |
| W. What other disadvantages would a tool such as the Tobacco ROI tool have for you?                                                       | <hr/> <hr/> <hr/> <hr/>  |   |   |   |   |   |   |                       |   |   |   |   |   |   |   |

14. Could you please indicate on a scale from 1 to 7 - 1 meaning “strongly disagree” and 7 meaning “strongly agree” to what extent you agree with the following statements? Please circle your answer in the column to the right.

|                                                                                                                                                               | <b>Strongly Disagree</b> |   |   |   |   |   |   | <b>Strongly Agree</b> |   |   |   |   |   |   |   |
|---------------------------------------------------------------------------------------------------------------------------------------------------------------|--------------------------|---|---|---|---|---|---|-----------------------|---|---|---|---|---|---|---|
| A. My boss will support me in using a tool such as the Tobacco ROI tool in decision making/information gathering                                              | 1                        | 2 | 3 | 4 | 5 | 6 | 7 | 1                     | 2 | 3 | 4 | 5 | 6 | 7 | ? |
| B. My other colleagues will support me in using a tool such as the Tobacco ROI tool                                                                           | 1                        | 2 | 3 | 4 | 5 | 6 | 7 | 1                     | 2 | 3 | 4 | 5 | 6 | 7 | ? |
| C. My organisation will support me in using a tool such as the Tobacco ROI tool in decision making/information gathering                                      | 1                        | 2 | 3 | 4 | 5 | 6 | 7 | 1                     | 2 | 3 | 4 | 5 | 6 | 7 | ? |
| D. Reimbursement agencies (e.g. health insurances) will support me in using a tool such as the Tobacco ROI tool in decision making/information gathering      | 1                        | 2 | 3 | 4 | 5 | 6 | 7 | 1                     | 2 | 3 | 4 | 5 | 6 | 7 | ? |
| E. My ministry of health will support me in using a tool such as the Tobacco ROI tool in decision making/information gathering                                | 1                        | 2 | 3 | 4 | 5 | 6 | 7 | 1                     | 2 | 3 | 4 | 5 | 6 | 7 | ? |
| F. Health professionals (i.e. GPs, medical specialists) will support me in using a tool such as the Tobacco ROI tool in decision making/information gathering | 1                        | 2 | 3 | 4 | 5 | 6 | 7 | 1                     | 2 | 3 | 4 | 5 | 6 | 7 | ? |
| G. Who else would support you in using the Tobacco ROI tool?                                                                                                  |                          |   |   |   |   |   |   |                       |   |   |   |   |   |   |   |

|                                                                                         |   |   |   |   |   |   |   |   |  |
|-----------------------------------------------------------------------------------------|---|---|---|---|---|---|---|---|--|
| <hr/> <hr/> <hr/> <hr/>                                                                 |   |   |   |   |   |   |   |   |  |
| H. I would encounter resistance using the Tobacco ROI tool                              | 1 | 2 | 3 | 4 | 5 | 6 | 7 | ? |  |
| I. Which organisations or colleagues would not support you to use the Tobacco ROI tool? |   |   |   |   |   |   |   |   |  |
| <hr/> <hr/>                                                                             |   |   |   |   |   |   |   |   |  |

| How confident are you about using the Tobacco ROI tool?<br>I am confident that:                                            | Strongly Disagree |   |   |   |   | Strongly Agree |   |   |  |
|----------------------------------------------------------------------------------------------------------------------------|-------------------|---|---|---|---|----------------|---|---|--|
| J. I will be able to use the ROI tool                                                                                      | 1                 | 2 | 3 | 4 | 5 | 6              | 7 | ? |  |
| K. I will be able to use the ROI tool when I need to enter the information on smoking cessation effects of programs myself | 1                 | 2 | 3 | 4 | 5 | 6              | 7 | ? |  |
| L. I will be able to understand the ROI tool when the data is given in a list of figures                                   | 1                 | 2 | 3 | 4 | 5 | 6              | 7 | ? |  |
| M. I will be able to use the ROI tool even if my organisation does not support me                                          | 1                 | 2 | 3 | 4 | 5 | 6              | 7 | ? |  |
| N. I will be able to use the ROI tool without help from others                                                             | 1                 | 2 | 3 | 4 | 5 | 6              | 7 | ? |  |
| O. Persons such as myself in my organisation will be able to use the ROI tool                                              | 1                 | 2 | 3 | 4 | 5 | 6              | 7 | ? |  |
| P. I will be able to interpret the output of the ROI tool                                                                  | 1                 | 2 | 3 | 4 | 5 | 6              | 7 | ? |  |
| Q. I will be able to use the tool with limited knowledge about health economics                                            | 1                 | 2 | 3 | 4 | 5 | 6              | 7 | ? |  |
| R. I will be able to use the ROI tool without technical support                                                            | 1                 | 2 | 3 | 4 | 5 | 6              | 7 | ? |  |
| S. I will be able to use the ROI tool without a manual                                                                     | 1                 | 2 | 3 | 4 | 5 | 6              | 7 | ? |  |
| T. I will be able to use the ROI tool without a website that explains how the ROI tool works                               | 1                 | 2 | 3 | 4 | 5 | 6              | 7 | ? |  |
| U. What other difficulties would using a tool such as the Tobacco ROI tool have for you?                                   |                   |   |   |   |   |                |   |   |  |
| <hr/> <hr/> <hr/> <hr/>                                                                                                    |                   |   |   |   |   |                |   |   |  |

15. Could you please indicate on a scale from 1 to 7 - 1 meaning “strongly disagree” and 7 meaning “strongly agree” to what extent you agree with the following statements? Please circle your answer in the column to the right.

|                                                                                             | Strongly Disagree |   |   |   |   |   | Strongly Agree |   |
|---------------------------------------------------------------------------------------------|-------------------|---|---|---|---|---|----------------|---|
| A. I have the intention to use a tool such as the Tobacco ROI tool                          | 1                 | 2 | 3 | 4 | 5 | 6 | 7              | ? |
| B. I have the intention to use a tool such as the Tobacco ROI tool within the next month    | 1                 | 2 | 3 | 4 | 5 | 6 | 7              | ? |
| C. I have the intention to use a tool such as the Tobacco ROI tool within the next 6 months | 1                 | 2 | 3 | 4 | 5 | 6 | 7              | ? |
| D. I have the intention to use a tool such as the Tobacco ROI tool within the next year     | 1                 | 2 | 3 | 4 | 5 | 6 | 7              | ? |
| E. I would like to have more information about the Tobacco ROI tool                         | 1                 | 2 | 3 | 4 | 5 | 6 | 7              | ? |

**Part D. Availability of tobacco control measures & smoking cessation interventions**

16. Please read this table! Would you tell me whether these tobacco control measures and smoking cessation interventions are available in .....? Could you also please indicate on a scale from 1 to 3 - 1 meaning “not important” and 3 meaning “important” - to what extent you think the following interventions are considered important in addressing smoking behaviour?

Note that the table proceeds on the next page.

| Category        | Name of intervention                                                                      | Availability |    |   | Importance |   |   |   |
|-----------------|-------------------------------------------------------------------------------------------|--------------|----|---|------------|---|---|---|
| Pharmacological | Nicotine replacement therapy                                                              | Yes          | No | ? | 1          | 2 | 3 | ? |
|                 | Bupropion                                                                                 | Yes          | No | ? | 1          | 2 | 3 | ? |
|                 | Varinicline                                                                               | Yes          | No | ? | 1          | 2 | 3 | ? |
| Behavioural     | Brief advice on smoking cessation given during one GP consultation                        | Yes          | No | ? | 1          | 2 | 3 | ? |
|                 | Advice on smoking cessation given according to the 5-step protocol (minimal intervention) | Yes          | No | ? | 1          | 2 | 3 | ? |
|                 | Community pharmacy-based services                                                         | Yes          | No | ? | 1          | 2 | 3 | ? |
|                 | Computer tailored programs                                                                | Yes          | No | ? | 1          | 2 | 3 | ? |
|                 | Internet based interventions                                                              | Yes          | No | ? | 1          | 2 | 3 | ? |
|                 | Group counselling by specially trained professionals                                      | Yes          | No | ? | 1          | 2 | 3 | ? |
|                 | Individual counselling by specially trained professionals                                 | Yes          | No | ? | 1          | 2 | 3 | ? |
|                 | Telephone counselling                                                                     | Yes          | No | ? | 1          | 2 | 3 | ? |
|                 | Self-help manuals                                                                         | Yes          | No | ? | 1          | 2 | 3 | ? |
|                 | Mobile phone-based interventions                                                          | Yes          | No | ? | 1          | 2 | 3 | ? |
|                 | Stage-based interventions                                                                 | Yes          | No | ? | 1          | 2 | 3 | ? |
| Combined        | Individual counselling by specially trained professionals with                            | Yes          | No | ? | 1          | 2 | 3 | ? |

|                 |                                                                                              |     |    |   |   |   |   |   |
|-----------------|----------------------------------------------------------------------------------------------|-----|----|---|---|---|---|---|
|                 | medication (e.g. NRT or bupropion)                                                           |     |    |   |   |   |   |   |
|                 | Group counselling by specially trained professionals with medication (e.g. NRT or bupropion) | Yes | No | ? | 1 | 2 | 3 | ? |
|                 | Brief advice by GP and medication                                                            | Yes | No | ? | 1 | 2 | 3 | ? |
| Nonconventional | Acupuncture                                                                                  | Yes | No | ? | 1 | 2 | 3 | ? |
|                 | Aromatherapy                                                                                 | Yes | No | ? | 1 | 2 | 3 | ? |
|                 | Herbs                                                                                        | Yes | No | ? | 1 | 2 | 3 | ? |
|                 | Smokeless tobacco                                                                            | Yes | No | ? | 1 | 2 | 3 | ? |
|                 | Hypnosis-based interventions                                                                 | Yes | No | ? | 1 | 2 | 3 | ? |
|                 | Magnetic resonance therapy                                                                   | Yes | No | ? | 1 | 2 | 3 | ? |
|                 | Homeopathy                                                                                   | Yes | No | ? | 1 | 2 | 3 | ? |
| Preventative    | Advertising restrictions/bans                                                                | Yes | No | ? | 1 | 2 | 3 | ? |
|                 | Product labelling and information/ Health warnings on tobacco products                       | Yes | No | ? | 1 | 2 | 3 | ? |
|                 | Restrictions on sales to minors                                                              | Yes | No | ? | 1 | 2 | 3 | ? |
|                 | Restrictions on smoking in workplaces and public places                                      | Yes | No | ? | 1 | 2 | 3 | ? |
|                 | Mass media campaigns                                                                         | Yes | No | ? | 1 | 2 | 3 | ? |
|                 | Tax increase                                                                                 | Yes | No | ? | 1 | 2 | 3 | ? |

17. What would you like to get out of being involved in this research project for you and your organisation?

---



---



---

18. The current version of the ROI model includes the following smoking-related diseases: lung cancer, coronary heart disease, chronic obstructive pulmonary disease, myocardial infarction, and stroke. Are there any other smoking related diseases that you would include in the ROI tool?

---

---

---

19. Comments about the interview:

---

---

---

---
